# Supplementary material for: Dehydration Alters Behavioral Thermoregulation and the Geography of Climatic Vulnerability in Amazonian Lizards
Source: Research Square preprint supplement (doi:10.21203/rs.3.rs-394961/v1), 2021-04-15
Supplement: Supplementary file 1 [file 00b63d2bdb7495dec9d75ffb.xlsx]

## Sheet: data
id	ploidy	sex	locality	Latitude	Longitude	Alt	turn	startt	vtm	tstart	tend	weight	date	sp	temp dif	time dif	hrate
40407			Santa Helena, Ilha	-61.7935	-1.39192	27.9913	3	27.5	30.2	08:57:00	09:02:00	0.591	22_04	Loxopholis ferreirai	2.7	5	0.54
40407							1	28	34.5	09:10:00	09:15:00	0.6494	20 _ 04	Loxopholis ferreirai	6.5	5	1.3
40407							2	27.1	29.2	08:50:00	08:52:00	0.501	21_04	Loxopholis ferreirai	2.1	2	1.05
40423			Santa Helena, Ilha	-61.7936	-1.3911	15.7472	1	28.8	32.4	10:09:00	10:13:00	0.928	22 _ 04	Loxopholis ferreirai	3.6	4	0.9
40423							2	23.5	29.2	07:42:00	07:49:00	0.848	23 _ 04	Loxopholis ferreirai	5.7	7	0.814286
40423							3	27.5	36.6	08:32:00	08:42:00	0.908	24 _ 04	Loxopholis ferreirai	9.1	10	0.91
40429			Santa Helena, Ilha	-61.7935	-1.39161	18.6371	3	27.32	35.3	09:11:00	09:16:00	0.888	23 _ 04	Loxopholis ferreirai	7.98	5	1.596
40429							1	28	32	08:35:00	08:38:00	0.9165	21 _ 04	Loxopholis ferreirai	4	3	1.33333
40429							2	25.07	27.02	08:16:00	08:23:00	0.832	22 _ 04	Loxopholis ferreirai	1.95	7	0.278571
40440			Santa Helena, Ilha	-61.7941	-1.39237	30.3754	1	29.8	34	09:10:00	09:14:00	0.556	21 _ 04	Loxopholis ferreirai	4.2	4	1.05
40440							3	27.1	33.2	08:50:00	08:58:00	0.557	23 _ 04	Loxopholis ferreirai	6.1	8	0.7625
40440							2	25.07	27.04	08:16:00	08:23:00	0.503	22 _ 04	Loxopholis ferreirai	1.97	7	0.281429
40442			Santa Helena, Ilha	-61.7951	-1.39294	22.2407	3	27.1	33.3	08:50:00	08:56:00	0.253	23 _ 04	Loxopholis ferreirai	6.2	6	1.03333
40442							1	27.4	35	09:10:00	09:17:00	0.2577	21 _ 04	Loxopholis ferreirai	7.6	7	1.08571
40442							2	27.5	32.5	08:57:00	09:01:00	0.209	22 _ 04	Loxopholis ferreirai	5	4	1.25
40444			Santa Helena, Ilha	-61.7951	-1.39294	22.2407	2	28.9	31.5	08:08:00	08:11:00	0.671	21 _ 04	Loxopholis ferreirai	2.6	3	0.866667
40444							1	26.3	33.4	09:10:00	09:16:00	0.735	20 _ 04	Loxopholis ferreirai	7.1	6	1.18333
40444							3	27.32	32.3	09:11:00	09:16:00	0.723	23 _ 04	Loxopholis ferreirai	4.98	5	0.996
40532			Curirú	-61.7804	-1.32154	15.651	2	23.5	24.1	07:42:00	07:43:00	0.632	23 _ 04	Loxopholis percarinatum	0.6	2	0.3
40532							3	27.5	31.6	08:32:00	08:40:00	0.758	24 _ 04	Loxopholis percarinatum	4.1	8	0.5125
40532							1	28.1	29.2	10:37:00	10:38:00	0.745	22 _ 04	Loxopholis percarinatum	1.1	1	1.1
40546			Santa Helena	-61.7951	-1.39294	22.2407	3	27.5	35.2	08:32:00	08:40:00	1.02	24 _ 04	Loxopholis ferreirai	7.7	8	0.9625
40546							1	28.8	32.2	10:09:00	10:16:00	1.051	22 _ 04	Loxopholis ferreirai	3.4	7	0.485714
40546							2	23.5	27.2	08:15:00	08:29:00	0.879	23 _ 04	Loxopholis ferreirai	3.7	14	0.264286
40613			Santa Helena	-61.7767	-1.41632	19.4622	3	24.9	31.9	08:34:00	08:39:00	0.548	26 _ 04	Loxopholis percarinatum	7	5	1.4
40613							2	24	29.1	08:32:00	08:37:00	0.473	25 _ 04	Loxopholis percarinatum	5.1	5	1.02
40613							1	27.2	30.9	08:47:00	08:48:00	0.542	24 _ 04	Loxopholis percarinatum	3.7	1	3.7
40616			Santa Helena	-61.7782	-1.41676	22.0517	1	25.5	31.2	08:17:00	08:22:00	0.555	24 _ 04	Loxopholis percarinatum	5.7	5	1.14
40616							3	27.6	31.2	08:34:00	08:38:00	0.557	26 _ 04	Loxopholis percarinatum	3.6	4	0.9
40616							2	24.2	29.8	08:06:00	08:10:00	0.483	25 _ 04	Loxopholis percarinatum	5.6	4	1.4
40660			Curirú	-61.7797	-1.32093	14.5706	1	25.7	31.6	10:04:00	10:07:00	0.65	24 _ 04	Loxopholis percarinatum	5.9	3	1.96667
40660							3	28.8	33.1	09:08:00	09:21:00	0.68	26 _ 04	Loxopholis percarinatum	4.3	13	0.330769
40660							2	24.2	29.1	08:06:00	08:13:00	0.59	25 _ 04	Loxopholis percarinatum	4.9	7	0.7
40713	3N		Santa Helena	-61.7783	-1.41684	23.6999	2	24.2	29.5	08:06:00	08:08:00	0.473	25 _ 04	Loxopholis percarinatum	5.3	2	2.65
40713							1	25.5	29.1	08:50:00	08:55:00	0.542	24 _ 04	Loxopholis percarinatum	3.6	5	0.72
40713							3	26.1	31.6	08:34:00	08:38:00	0.548	26 _ 04	Loxopholis percarinatum	5.5	4	1.375
40773			Santa Helena	-61.7777	-1.41672	20.5919	1	25.5	28.1	08:50:00	08:53:00	0.86	26 _ 04	Loxopholis percarinatum	2.6	3	0.866667
40773							2	22.8	26.9	08:06:00	08:13:00	0.705	27 _ 04	Loxopholis percarinatum	4.1	7	0.585714
40773							3	26.5	30.6	08:47:00	08:50:00	0.84	28 _ 04	Loxopholis percarinatum	4.1	3	1.36667
40778	3N		Curirú	-61.7778	-1.31994	41.571	2	24.4	26.6	08:19:00	08:25:00	0.5	28 _ 04	Loxopholis percarinatum	2.2	6	0.366667
40778							3	24.1	29.5	08:17:00	1900-01-08	0.571	29_04	Loxopholis percarinatum	5.4	43	0.125581
40778							1	23.7	29.4	09:46:00	09:51:00	0.55	27 _ 04	Loxopholis percarinatum	5.7	5	1.14
40821			Santa Helena	-61.7783	-1.41684	23.6999	3	23.4	27.8	09:25:00	09:28:00	0.712	28 _ 04	Loxopholis percarinatum	4.4	3	1.46667
40821							1	26.5	29	10:48:00	10:50:00	0.7	26 _ 04	Loxopholis percarinatum	2.5	2	1.25
40821							2	24.5	27.2	08:22:00	08:26:00	0.67	27 _ 04	Loxopholis percarinatum	2.7	4	0.675
40829	3N		Santa Helena	-61.7799	-1.41893	51.3105	2	22.8	26.5	08:06:00	08:08:00	0.699	27 _ 04	Loxopholis percarinatum	3.7	2	1.85
40829							1	23.6	28.2	10:03:00	10:07:00	0.723	26 _ 04	Loxopholis percarinatum	4.6	4	1.15
40829							3	23.4	29.5	09:25:00	09:28:00	0.71	28 _ 04	Loxopholis percarinatum	6.1	3	2.03333
40840			Santa Helena	-61.7941	-1.39237	30.3754	2	24.5	28.8	08:22:00	08:28:00	0.502	27 _ 04	Loxopholis percarinatum	4.3	6	0.716667
40840							3	24.3	30.4	08:08:00	08:15:00	0.575	28 _ 04	Loxopholis percarinatum	6.1	7	0.871429
40840							1	23.7	30.5	10:24:00	10:28:00	0.597	26 _ 04	Loxopholis percarinatum	6.8	4	1.7
40841			Santa Helena	-61.7778	-1.41664	21.6968	2	22.8	26.7	08:06:00	08:12:00	0.432	27 _ 04	Loxopholis percarinatum	3.9	6	0.65
40841							1	24.8	30.4	07:07:00	07:09:00	0.47	26 _ 04	Loxopholis percarinatum	5.6	2	2.8
40841							3	26.5	30.8	08:47:00	08:50:00	0.49	28 _ 04	Loxopholis percarinatum	4.3	3	1.43333
40856	3N		Curirú	-61.7783	-1.32016	18.0893	1	24.5	28.5	09:22:00	09:26:00	0.807	27 _ 04	Loxopholis percarinatum	4	4	1
40856							2	24.3	27.4	08:36:00	08:39:00	0.701	28 _ 04	Loxopholis percarinatum	3.1	3	1.03333
40856							3	24.3	28.3	08:47:00	08:52:00	0.797	29_04	Loxopholis percarinatum	4	5	0.8
40918		M	Curirú	-61.7806	-1.32161	16.5435	2	24.4	27	08:19:00	08:23:00	0.462	28 _ 04	Loxopholis percarinatum	2.6	4	0.65
40918							1	24	31.5	11:24:00	11:30:00	0.507	27 _ 04	Loxopholis percarinatum	7.5	6	1.25
40918							3	24.3	29.6	08:47:00	08:52:00	0.501	29_04	Loxopholis percarinatum	5.3	5	1.06
41143			Serra do Jacamim	-65.4831	-0.307706	41.514	3	25.6	30	08:58:00	09:06:00	0.596	6 _ 5	Loxopholis percarinatum	4.4	8	0.55
41143							2	23.1	29.8	08:15:00	08:25:00	0.505	4 _ 5	Loxopholis percarinatum	6.7	10	0.67
41143							1	25.6	33.3	08:37:00	08:44:00	0.607	5 _ 3	Loxopholis percarinatum	7.7	7	1.1
41166			Boa Vista	-65.4097	-0.341461	27.0147	3	25.6	29.5	08:58:00	09:06:00	0.611	6 _ 5	Loxopholis percarinatum	3.9	8	0.4875
41166							1	25.6	28	08:37:00	08:39:00	0.628	5 _ 3	Loxopholis percarinatum	2.4	2	1.2
41166							2	24.7	27.4	08:44:00	08:46:00	0.581	4 _ 5	Loxopholis percarinatum	2.7	2	1.35
41195			Serra do Jacamim	-65.4827	-0.309764	49.1093	1	26.9	28.7	09:26:00	09:28:00	0.54	4 _ 5	Loxopholis percarinatum	1.8	2	0.9
41195							2	23.6	26.7	07:46:00	07:47:00	0.478	5 _ 5	Loxopholis percarinatum	3.1	1	3.1
41195							3	24.9	27.4	08:34:00	08:38:00	0.553	6 _ 5	Loxopholis percarinatum	2.5	4	0.625
41197			Ilha Uruari	-65.4183	-0.253284	35.4754	2	25	28.6	08:34:00	08:39:00	1.103	6 _ 5	Loxopholis ferreirai	3.6	5	0.72
41197							3	26.9	32	09:26:00	09:29:00	1.229	7 _ 5	Loxopholis ferreirai	5.1	3	1.7
41197							1	25.3	31.4	08:35:00	08:41:00	1.158	5 _ 5	Loxopholis ferreirai	6.1	6	1.01667
41198			Ilha Uruari	-65.4225	-0.33345	35.1619	2	23.8	28.6	07:20:00	07:26:00	0.61	5 _ 5	Loxopholis ferreirai	4.8	6	0.8
41198							3	26	31.5	08:23:00	08:27:00	0.653	6 _ 5	Loxopholis ferreirai	5.5	4	1.375
41198							1	23.1	28.3	07:57:00	08:02:00	0.644	4 _ 5	Loxopholis ferreirai	5.2	5	1.04
41201			Boa Vista	-65.4095	-0.341556	45.3075	2	27.3	29.5	09:14:00	09:19:00	0.666	6 _ 5	Loxopholis percarinatum	2.2	5	0.44
41201							1	26.9	28.5	09:26:00	09:28:00	0.737	5 _ 5	Loxopholis percarinatum	1.6	2	0.8
41201							3	24	31.7	08:23:00	08:27:00	0.737	7 _ 5	Loxopholis percarinatum	7.7	4	1.925
41213			Boa Vista	-65.4073	-0.344138	71.4985	2	24.5	28.8	08:32:00	08:40:00	0.595	6 _ 5	Loxopholis percarinatum	4.3	8	0.5375
41213							3	24	30	08:23:00	08:26:00	0.611	7 _ 5	Loxopholis percarinatum	6	3	2
41213							1	23.8	31.3	07:20:00	07:29:00	0.67	5 _ 5	Loxopholis percarinatum	7.5	9	0.833333
41336			Boa Vista	-65.4073	-0.344138	71.4985	1	22.5	27.2	07:44:00	07:51:00	0.62	6 _ 5	Loxopholis percarinatum	4.7	7	0.671429
41336							3	25.3	33	08:35:00	08:40:00	0.633	8 _ 5	Loxopholis percarinatum	7.7	5	1.54
41336							2	23.5	29	07:30:00	07:34:00	0.525	7 _ 5	Loxopholis percarinatum	5.5	4	1.375

## Sheet: L percarinatum coords
lon	lat	country
-59.3913	3.16735	Guyana
-59.4055	3.20617	Guyana
-59.4055	3.20617	Guyana
-59.0812	4.18269	Guyana
-58.5085	4.28784	Guyana
-60.0106	-3.85361	Brazil
-58.6833	5.15	Guyana
-58.6833	5.15	Guyana
-60.4911	7.3706	Guyana
-64.5633	-10.3214	Brazil
-64.5633	-10.3214	Brazil
-64.5633	-10.3214	Brazil
-64.5633	-10.3214	Brazil
-64.5633	-10.3214	Brazil
-64.5633	-10.3214	Brazil
-59.0453	5.2186	Guyana
-59.0453	5.2186	Guyana
-59.0453	5.2186	Guyana
-59.0453	5.2186	Guyana
-59.0453	5.2186	Guyana
-59.0453	5.2186	Guyana
-58.2372	5.085	Guyana
-58.2372	5.085	Guyana
-58.2372	5.085	Guyana
-58.2372	5.085	Guyana
-58.2372	5.085	Guyana
-58.2372	5.085	Guyana
-58.8494	4.42	Guyana
-58.8494	4.42	Guyana
-58.7956	4.3289	Guyana
-58.5094	4.285	Guyana
-58.5094	4.285	Guyana
-58.5094	4.285	Guyana
-58.7475	4.5833	Guyana
-59.0244	4.7547	Guyana
-58.5094	4.285	Guyana
-59.0244	4.7547	Guyana
-54.8346	-3.14564	Brazil
-54.8326	-3.15347	Brazil
-54.8326	-3.15347	Brazil
-54.8305	-3.16078	Brazil
-54.8305	-3.16078	Brazil
-54.8326	-3.15347	Brazil
-54.8305	-3.16078	Brazil
-54.8305	-3.16078	Brazil
-54.8305	-3.16078	Brazil
-54.8305	-3.16078	Brazil
-57.8589	5.6819	Guyana
-58.2178	6.4986	Guyana
-61.2038	1.55	Brazil
-61.2038	1.55	Brazil
-61.2038	1.55	Brazil
-61.2038	1.55	Brazil
-61.2038	1.55	Brazil
-61.2038	1.55	Brazil
-61.2038	1.55	Brazil
-61.2038	1.55	Brazil
-61.2038	1.55	Brazil
-61.2038	1.55	Brazil
-61.2038	1.55	Brazil
-61.2038	1.55	Brazil
-60.0253	-2.20899	Brazil
-56.6708	-1.1886	Brazil
-59	5	Guyana
-59	5	Guyana
-58.6833	5.15	Guyana
-58.6833	5.15	Guyana
-68.3552	-2.89187	Brazil
-68.3231	-4.66278	Brazil
-65.0556	-9.59694	Brazil
-65.4333	-9.64028	Brazil
-65.4564	-9.62944	Brazil
-64.8031	0.399722	Brazil
-59.6872	-4.44194	Brazil
-65.3339	-10.7681	Brazil
-62.1319	-4.72722	Brazil
-62.9694	-4.97111	Brazil
-62.9242	-0.974722	Brazil
-62.1694	-1.05611	Brazil
-60.8344	-5.4894	Brazil
-61.1447	4.46056	Brazil
-61.6667	3.41667	Brazil
-61.2667	1.55	Brazil
-60.8764	-2.48875	Brazil
-60.35	-6.4	Brazil
-60.1778	-6.0125	Brazil
-59.7167	-2.41667	Brazil
-59.5	3	Guyana
-59.1287	3.2667	Guyana
-58.6364	-4.30889	Brazil
-58.2253	-2.03194	Brazil
-58.2183	-2.71222	Brazil
-57.2133	-1.71401	Brazil
-56.3122	-4.57556	Brazil
-58.6959	1.28542	Brazil
-55.1864	-0.165488	Brazil
-54.8326	-3.15347	Brazil
-63.096	-4.08917	Brazil
-55.8333	-1.5	Brazil
-53.2396	-0.936297	Brazil
-52.0702	-3.3283	Brazil
-51.1175	-10.0169	Brazil
-51.8972	-0.024167	Brazil
-51.771	3.87942	Brazil
-51.6715	-3.5046	Brazil
-51.6109	2.32156	Brazil
-51.6153	-1.99355	Brazil
-50.4983	-0.417304	Brazil
-47.9167	-7.85	Brazil
-47.5667	-5.28333	Brazil
-47.3201	-1.15586	Brazil
-46.3729	-1.44357	Brazil

## Sheet: T&HR during dessication
Time	Date	temp	humidity	logger2
23:12:58	2018-04-21	25.4	68.4	2
23:42:58	2018-04-21	25.4	68.4	2
00:12:58	2018-04-22	25.3	68.3	2
00:42:58	2018-04-22	25.3	68.4	2
01:12:58	2018-04-22	25.3	68.5	2
01:42:58	2018-04-22	25.3	68.5	2
02:12:58	2018-04-22	25.3	68.6	2
02:42:58	2018-04-22	25.3	68.6	2
03:12:58	2018-04-22	25.4	68.7	2
03:42:58	2018-04-22	25.4	68.7	2
04:12:58	2018-04-22	25.4	68.8	2
04:42:58	2018-04-22	25.3	68.8	2
05:12:58	2018-04-22	25.3	68.8	2
05:42:58	2018-04-22	25.3	68.9	2
06:12:58	2018-04-22	25.4	68.9	2
06:42:58	2018-04-22	25.4	69.3	2
07:12:58	2018-04-22	25.4	69.4	2
07:42:58	2018-04-22	25.4	69.5	2
08:12:58	2018-04-22	25.4	69.5	2
08:42:58	2018-04-22	25.4	69.5	2
23:12:58	2018-04-22	24.7	72.2	2
23:42:58	2018-04-22	24.6	72.5	2
00:12:58	2018-04-27	23.9	75.3	2
00:42:58	2018-04-27	23.8	74.8	2
01:12:58	2018-04-27	23.6	74.2	2
01:42:58	2018-04-27	23.4	73.7	2
02:12:58	2018-04-27	23.2	73.6	2
02:42:58	2018-04-27	23.1	73.6	2
03:12:58	2018-04-27	23.1	73.6	2
03:42:58	2018-04-27	23	73.8	2
04:12:58	2018-04-27	22.9	73.9	2
04:42:58	2018-04-27	22.9	74.1	2
05:12:58	2018-04-27	23	74.2	2
05:42:58	2018-04-27	23	74.3	2
06:12:58	2018-04-27	23.1	74.5	2
06:42:58	2018-04-27	23.1	74.6	2
07:12:58	2018-04-27	23.2	74	2
07:42:58	2018-04-27	23.3	73.9	2
08:12:58	2018-04-27	23.9	74.7	2
08:42:58	2018-04-27	24.3	74.5	2
23:12:58	2018-04-27	25.2	73.4	2
23:42:58	2018-04-27	24.9	72.6	2
00:12:58	2018-05-03	25.2	76.6	2
00:42:58	2018-05-03	25.1	76.6	2
01:12:58	2018-05-03	25	76.6	2
01:42:58	2018-05-03	24.9	76.6	2
02:12:58	2018-05-03	24.8	76.5	2
02:42:58	2018-05-03	24.7	76.5	2
03:12:58	2018-05-03	24.6	76.5	2
03:42:58	2018-05-03	24.4	76.5	2
04:12:58	2018-05-03	24.2	76.5	2
04:42:58	2018-05-03	24.1	76.5	2
05:12:58	2018-05-03	24	76.5	2
05:42:58	2018-05-03	24	76.7	2
06:12:58	2018-05-03	24	76.7	2
06:42:58	2018-05-03	23.9	76.7	2
07:12:58	2018-05-03	23.9	76.6	2
07:42:58	2018-05-03	23.8	76.6	2
08:12:58	2018-05-03	23.7	76.7	2
08:42:58	2018-05-03	23.8	76.8	2
23:12:58	2018-05-03	24.7	76.7	2
23:42:58	2018-05-03	24.4	76.5	2
00:12:58	2018-05-04	26.3	78.2	2
00:42:58	2018-05-04	26.3	77.2	2
01:12:58	2018-05-04	26.3	76.9	2
01:42:58	2018-05-04	26.3	76.8	2
02:12:58	2018-05-04	26.2	76.7	2
02:42:58	2018-05-04	26.2	76.7	2
03:12:58	2018-05-04	26.2	76.8	2
03:42:58	2018-05-04	26.1	76.8	2
04:12:58	2018-05-04	26.1	76.8	2
04:42:58	2018-05-04	26	76.9	2
05:12:58	2018-05-04	26	76.9	2
05:42:58	2018-05-04	25.9	76.9	2
06:12:58	2018-05-04	25.9	77	2
06:42:58	2018-05-04	25.8	77	2
07:12:58	2018-05-04	25.8	77.1	2
07:42:58	2018-05-04	25.7	77.2	2
08:12:58	2018-05-04	25.8	77.5	2
08:42:58	2018-05-04	26	77.9	2
23:12:58	2018-05-04	25.3	77.7	2
23:42:58	2018-05-04	25.7	69.3	2
00:12:58	2018-05-05	25.7	66.5	2
00:42:58	2018-05-05	25.6	65.3	2
01:12:58	2018-05-05	25.5	64.6	2
01:42:58	2018-05-05	25.4	64.2	2
02:12:58	2018-05-05	25.3	64.1	2
02:42:58	2018-05-05	25.2	64.1	2
03:12:58	2018-05-05	25.1	64	2
03:42:58	2018-05-05	25	64	2
04:12:58	2018-05-05	24.9	64.3	2
04:42:58	2018-05-05	25	64.4	2
05:12:58	2018-05-05	25	64.3	2
05:42:58	2018-05-05	24.9	64.3	2
06:12:58	2018-05-05	24.8	64.5	2
06:42:58	2018-05-05	24.8	64.6	2
07:12:58	2018-05-05	24.7	64.6	2
07:42:58	2018-05-05	24.9	66.3	2
08:12:58	2018-05-05	25.1	67.2	2
08:42:58	2018-05-05	25.4	67	2
23:12:58	2018-05-05	25.1	68.5	2
23:42:58	2018-05-05	25	68.5	2
00:12:58	2018-05-06	25	68.6	2
00:42:58	2018-05-06	25	69.9	2
01:12:58	2018-05-06	25.2	70.1	2
01:42:58	2018-05-06	25.2	70	2
02:12:58	2018-05-06	25.2	69.9	2
02:42:58	2018-05-06	25.2	69.9	2
03:12:58	2018-05-06	25.2	69.8	2
03:42:58	2018-05-06	25.2	69.9	2
04:12:58	2018-05-06	25.1	69.9	2
04:42:58	2018-05-06	25.1	70	2
05:12:58	2018-05-06	25.1	70	2
05:42:58	2018-05-06	25	70.1	2
06:12:58	2018-05-06	25	70.1	2
06:42:58	2018-05-06	25	70.2	2
07:12:58	2018-05-06	24.9	70.2	2
07:42:58	2018-05-06	24.9	70.3	2
08:12:58	2018-05-06	24.8	71.1	2
08:42:58	2018-05-06	24.7	71	2
23:12:58	2018-05-06	24.6	72.2	2
23:42:58	2018-05-06	24.6	72.5	2
23:14:13	2018-04-21	25.6	68	1
23:44:13	2018-04-21	25.6	68	1
00:14:13	2018-04-22	25.5	68.1	1
00:44:13	2018-04-22	25.6	68.1	1
01:14:13	2018-04-22	25.6	68.1	1
01:44:13	2018-04-22	25.5	68.1	1
02:14:13	2018-04-22	25.5	68.1	1
02:44:13	2018-04-22	25.6	68.2	1
03:14:13	2018-04-22	25.6	68.2	1
03:44:13	2018-04-22	25.6	68.3	1
04:14:13	2018-04-22	25.6	68.3	1
04:44:13	2018-04-22	25.6	68.4	1
05:14:13	2018-04-22	25.6	68.4	1
05:44:13	2018-04-22	25.6	68.4	1
06:14:13	2018-04-22	25.6	68.5	1
06:44:13	2018-04-22	25.7	68.5	1
07:14:13	2018-04-22	25.7	68.6	1
07:44:13	2018-04-22	25.7	68.7	1
08:14:13	2018-04-22	25.7	68.6	1
08:44:13	2018-04-22	25.7	68.9	1
23:14:13	2018-04-22	25.3	69.7	1
23:44:13	2018-04-22	25.1	70	1
00:14:13	2018-04-23	25	68.2	1
00:44:13	2018-04-23	25	68.4	1
01:14:13	2018-04-23	24.9	68.4	1
01:44:13	2018-04-23	24.8	68.6	1
02:14:13	2018-04-23	24.8	68.7	1
02:44:13	2018-04-23	24.7	68.8	1
03:14:13	2018-04-23	24.7	68.9	1
03:44:13	2018-04-23	24.6	68.9	1
04:14:13	2018-04-23	24.5	68.5	1
04:44:13	2018-04-23	24.4	68.6	1
05:14:13	2018-04-23	24.3	68.9	1
05:44:13	2018-04-23	24.2	69.2	1
06:14:13	2018-04-23	24.2	69.6	1
06:44:13	2018-04-23	24.2	69.9	1
07:14:13	2018-04-23	24.2	71	1
07:44:13	2018-04-23	24.3	71.2	1
08:14:13	2018-04-23	24.4	72.1	1
08:44:13	2018-04-23	24.8	72.1	1
23:14:13	2018-04-23	26.2	70.6	1
23:44:13	2018-04-23	26.2	70.9	1
00:14:13	2018-04-24	26	70.8	1
00:44:13	2018-04-24	26	71.4	1
01:14:13	2018-04-24	26.1	71.6	1
01:44:13	2018-04-24	26.1	71.4	1
02:14:13	2018-04-24	26.1	70.3	1
02:44:13	2018-04-24	25.9	69.8	1
03:14:13	2018-04-24	25.7	68.3	1
03:44:13	2018-04-24	25.7	72.8	1
04:14:13	2018-04-24	25.7	72.6	1
04:44:13	2018-04-24	25.6	72.4	1
05:14:13	2018-04-24	25.5	72.4	1
05:44:13	2018-04-24	25.3	72.4	1
06:14:13	2018-04-24	25.2	72.5	1
06:44:13	2018-04-24	25.1	72.5	1
07:14:13	2018-04-24	25.1	72.5	1
07:44:13	2018-04-24	25.3	72.5	1
08:14:13	2018-04-24	25.4	72.4	1
08:44:13	2018-04-24	25.7	72.4	1
23:14:13	2018-04-24	25.8	72.4	1
23:44:13	2018-04-24	25.7	72.8	1
00:14:13	2018-04-25	25.6	72.9	1
00:44:13	2018-04-25	25.6	72	1
01:14:13	2018-04-25	25.6	71.5	1
01:44:13	2018-04-25	25.5	70.1	1
02:14:13	2018-04-25	25.4	68.3	1
02:44:13	2018-04-25	25.3	68.6	1
03:14:13	2018-04-25	25.2	69.2	1
03:44:13	2018-04-25	25.1	69.2	1
04:14:13	2018-04-25	25.1	69.5	1
04:44:13	2018-04-25	25.1	68.9	1
05:14:13	2018-04-25	25.1	72.1	1
05:44:13	2018-04-25	25.1	72.5	1
06:14:13	2018-04-25	25	73.6	1
06:44:13	2018-04-25	25	70.5	1
07:14:13	2018-04-25	25	70.4	1
07:44:13	2018-04-25	25	68.8	1
08:14:13	2018-04-25	24.9	68.5	1
08:44:13	2018-04-25	25.1	68.2	1
23:14:13	2018-04-25	27.2	70.4	1
23:44:13	2018-04-25	27	68.6	1
00:14:13	2018-04-26	27.1	68.3	1
00:44:13	2018-04-26	27	69.2	1
01:14:13	2018-04-26	26.8	68.2	1
01:44:13	2018-04-26	26.8	68.1	1
02:14:13	2018-04-26	26.6	68.1	1
02:44:13	2018-04-26	26.4	68.1	1
03:14:13	2018-04-26	26.5	68.1	1
03:44:13	2018-04-26	26.4	68.1	1
04:14:13	2018-04-26	26.2	68.1	1
04:44:13	2018-04-26	26.2	68.1	1
05:14:13	2018-04-26	26.1	68.1	1
05:44:13	2018-04-26	26	68.2	1
06:14:13	2018-04-26	26	68.3	1
06:44:13	2018-04-26	25.9	68.1	1
07:14:13	2018-04-26	26	68.1	1
07:44:13	2018-04-26	26.6	68.2	1
08:14:13	2018-04-26	27.1	68.3	1
08:44:13	2018-04-26	26.7	68.3	1
23:14:13	2018-04-26	24.1	68.3	1
23:44:13	2018-04-26	24.1	68.5	1
00:14:13	2018-04-27	24.5	68.5	1
00:44:13	2018-04-27	24.6	68.6	1
01:14:13	2018-04-27	24.5	68.7	1
01:44:13	2018-04-27	24.3	68.7	1
02:14:13	2018-04-27	24.1	68.9	1
02:44:13	2018-04-27	23.9	75.8	1
03:14:13	2018-04-27	23.8	76.7	1
03:44:13	2018-04-27	23.7	76.9	1
04:14:13	2018-04-27	23.6	77	1
04:44:13	2018-04-27	23.6	75.6	1
05:14:13	2018-04-27	23.6	73.4	1
05:44:13	2018-04-27	23.6	73.5	1
06:14:13	2018-04-27	23.6	73.5	1
06:44:13	2018-04-27	23.7	73.5	1
07:14:13	2018-04-27	23.7	73.6	1
07:44:13	2018-04-27	23.7	73.7	1
08:14:13	2018-04-27	23.9	73.8	1
08:44:13	2018-04-27	24.1	73.3	1
23:14:13	2018-04-27	25.3	73.7	1
23:44:13	2018-04-27	24.8	73.9	1
00:14:13	2018-04-28	25.3	74	1
00:44:13	2018-04-28	25.5	74	1
01:14:13	2018-04-28	25.3	74.1	1
01:44:13	2018-04-28	25.1	74.1	1
02:14:13	2018-04-28	24.9	74.1	1
02:44:13	2018-04-28	24.7	74.1	1
03:14:13	2018-04-28	24.6	74.2	1
03:44:13	2018-04-28	24.4	74.2	1
04:14:13	2018-04-28	24.3	74.2	1
04:44:13	2018-04-28	24.2	74.1	1
05:14:13	2018-04-28	24.2	74.4	1
05:44:13	2018-04-28	24.3	73.8	1
06:14:13	2018-04-28	24.5	73.3	1
06:44:13	2018-04-28	24.7	73.2	1
07:14:13	2018-04-28	24.8	73.5	1
07:44:13	2018-04-28	25	73.8	1
08:14:13	2018-04-28	25.2	73.8	1
08:44:13	2018-04-28	26	73.8	1
23:14:13	2018-04-28	25.9	76.2	1
23:44:13	2018-04-28	25.7	78.6	1
00:14:13	2018-04-29	25.7	74.4	1
00:44:13	2018-04-29	25.7	78.6	1
01:14:13	2018-04-29	25.5	78.4	1
01:44:13	2018-04-29	25.5	79.1	1
02:14:13	2018-04-29	25.5	78.2	1
02:44:13	2018-04-29	25.4	78.1	1
03:14:13	2018-04-29	25.3	80.6	1
03:44:13	2018-04-29	25	74.3	1
04:14:13	2018-04-29	24.8	74.4	1
04:44:13	2018-04-29	24.6	74.4	1
05:14:13	2018-04-29	24.6	74.5	1
05:44:13	2018-04-29	24.5	74.6	1
06:14:13	2018-04-29	24.3	74.6	1
06:44:13	2018-04-29	24.1	74.9	1
07:14:13	2018-04-29	24.1	74.8	1
07:44:13	2018-04-29	24.3	74.6	1
08:14:13	2018-04-29	24.9	80.3	1
08:44:13	2018-04-29	25.2	81.2	1
23:14:13	2018-04-29	26.3	76.3	1
23:44:13	2018-04-29	26.2	76.3	1
00:14:13	2018-04-30	26.1	76.4	1
00:44:13	2018-04-30	26.1	76.4	1
01:14:13	2018-04-30	26.1	76.5	1
01:44:13	2018-04-30	26.1	76.5	1
02:14:13	2018-04-30	26	76.5	1
02:44:13	2018-04-30	25.9	76.6	1
03:14:13	2018-04-30	25.9	76.6	1
03:44:13	2018-04-30	25.9	76.6	1
04:14:13	2018-04-30	25.8	76.7	1
04:44:13	2018-04-30	25.7	76.7	1
05:14:13	2018-04-30	25.6	76.7	1
05:44:13	2018-04-30	25.6	76.8	1
06:14:13	2018-04-30	25.5	76.9	1
06:44:13	2018-04-30	25.4	76.9	1
07:14:13	2018-04-30	25.4	77	1
07:44:13	2018-04-30	25.3	77	1
08:14:13	2018-04-30	25.3	77.1	1
08:44:13	2018-04-30	25.3	77.2	1
23:14:13	2018-04-30	27.5	77	1
23:44:13	2018-04-30	27.4	77.1	1
00:14:13	2018-05-01	27.3	77.1	1
00:44:13	2018-05-01	27.2	77.1	1
01:14:13	2018-05-01	27.1	77.1	1
01:44:13	2018-05-01	27	77.1	1
02:14:13	2018-05-01	26.9	77.1	1
02:44:13	2018-05-01	26.8	77.1	1
03:14:13	2018-05-01	26.7	77.2	1
03:44:13	2018-05-01	26.6	77.2	1
04:14:13	2018-05-01	26.5	77.2	1
04:44:13	2018-05-01	26.5	77.3	1
05:14:13	2018-05-01	26.2	77.1	1
05:44:13	2018-05-01	26	77.1	1
06:14:13	2018-05-01	25.8	77	1
06:44:13	2018-05-01	25.6	77	1
07:14:13	2018-05-01	25.5	77.1	1
07:44:13	2018-05-01	25.3	77.2	1
08:14:13	2018-05-01	25.3	77.3	1
08:44:13	2018-05-01	25.2	77.7	1
23:14:13	2018-05-01	26.3	79.2	1
23:44:13	2018-05-01	26.2	79.1	1
00:14:13	2018-05-02	26.1	79.1	1
00:44:13	2018-05-02	26	79.3	1
01:14:13	2018-05-02	25.9	79.3	1
01:44:13	2018-05-02	25.9	79.3	1
02:14:13	2018-05-02	25.8	79.4	1
02:44:13	2018-05-02	25.7	79.4	1
03:14:13	2018-05-02	25.7	79.4	1
03:44:13	2018-05-02	25.6	79.5	1
04:14:13	2018-05-02	25.6	79.6	1
04:44:13	2018-05-02	25.5	79.6	1
05:14:13	2018-05-02	25.4	79.6	1
05:44:13	2018-05-02	25.4	79.6	1
06:14:13	2018-05-02	25.3	79.7	1
06:44:13	2018-05-02	25.2	79.8	1
07:14:13	2018-05-02	25.1	79.8	1
07:44:13	2018-05-02	25.1	79.9	1
08:14:13	2018-05-02	25.1	80	1
08:44:13	2018-05-02	25.1	80.2	1
23:14:13	2018-05-02	27.8	79.8	1
23:44:13	2018-05-02	27.7	79.8	1
00:14:13	2018-05-03	27.6	79.9	1
00:44:13	2018-05-03	27.5	79.9	1
01:14:13	2018-05-03	27.4	79.9	1
01:44:13	2018-05-03	27.4	79.9	1
02:14:13	2018-05-03	27.3	79.9	1
02:44:13	2018-05-03	27.1	80	1
03:14:13	2018-05-03	27	80.1	1
03:44:13	2018-05-03	26.8	80.1	1
04:14:13	2018-05-03	26.7	80.1	1
04:44:13	2018-05-03	26.6	80.1	1
05:14:13	2018-05-03	26.6	80	1
05:44:13	2018-05-03	26.5	80.1	1
06:14:13	2018-05-03	26.5	80.1	1
06:44:13	2018-05-03	26.5	80.1	1
07:14:13	2018-05-03	26.4	80	1
07:44:13	2018-05-03	26.3	80.1	1
08:14:13	2018-05-03	26.3	80.2	1
08:44:13	2018-05-03	26.3	80.3	1
23:14:13	2018-05-03	27.2	79.4	1
23:44:13	2018-05-03	27.1	79.4	1
00:14:13	2018-05-04	26.9	79.4	1
00:44:13	2018-05-04	26.7	79.6	1
01:14:13	2018-05-04	26.6	79.7	1
01:44:13	2018-05-04	26.6	79.8	1
02:14:13	2018-05-04	26.5	79.9	1
02:44:13	2018-05-04	26.4	80	1
03:14:13	2018-05-04	26.4	80.1	1
03:44:13	2018-05-04	26.3	80.1	1
04:14:13	2018-05-04	26.2	80.2	1
04:44:13	2018-05-04	26.1	80.3	1
05:14:13	2018-05-04	26.1	80.3	1
05:44:13	2018-05-04	26	80.3	1
06:14:13	2018-05-04	26	80.5	1
06:44:13	2018-05-04	25.9	80.5	1
07:14:13	2018-05-04	25.8	80.6	1
07:44:13	2018-05-04	25.8	80.7	1
08:14:13	2018-05-04	25.9	80.7	1
08:44:13	2018-05-04	26	80.9	1
23:14:13	2018-05-04	25.4	79.8	1
23:44:13	2018-05-04	25.7	70.8	1
00:14:13	2018-05-05	25.6	67.4	1
00:44:13	2018-05-05	25.5	66.2	1
01:14:13	2018-05-05	25.4	65.6	1
01:44:13	2018-05-05	25.3	65.4	1
02:14:13	2018-05-05	25.2	65.2	1
02:44:13	2018-05-05	25.1	65.3	1
03:14:13	2018-05-05	25	65.3	1
03:44:13	2018-05-05	25	65.3	1
04:14:13	2018-05-05	25	65.4	1
04:44:13	2018-05-05	25	65.8	1
05:14:13	2018-05-05	25	65.5	1
05:44:13	2018-05-05	24.9	65.4	1
06:14:13	2018-05-05	24.9	65.5	1
06:44:13	2018-05-05	24.8	65.7	1
07:14:13	2018-05-05	24.7	65.6	1
07:44:13	2018-05-05	25.1	74.1	1
08:14:13	2018-05-05	25.5	68.3	1
08:44:13	2018-05-05	25.7	67.6	1
23:14:13	2018-05-05	25.1	68.4	1
23:44:13	2018-05-05	25	68.4	1
00:14:13	2018-05-06	24.9	68.5	1
00:44:13	2018-05-06	25.1	70.8	1
01:14:13	2018-05-06	25.2	70.5	1
01:44:13	2018-05-06	25.2	70.6	1
02:14:13	2018-05-06	25.2	70.6	1
02:44:13	2018-05-06	25.2	70.7	1
03:14:13	2018-05-06	25.2	70.9	1
03:44:13	2018-05-06	25.1	71	1
04:14:13	2018-05-06	25.1	71.1	1
04:44:13	2018-05-06	25.1	71.2	1
05:14:13	2018-05-06	25	71.3	1
05:44:13	2018-05-06	25	71.4	1
06:14:13	2018-05-06	24.9	71.5	1
06:44:13	2018-05-06	24.9	71.7	1
07:14:13	2018-05-06	24.9	71.2	1
07:44:13	2018-05-06	24.9	70	1
08:14:13	2018-05-06	24.9	70.2	1
08:44:13	2018-05-06	25	71.3	1
23:14:13	2018-05-06	24.6	79	1
23:44:13	2018-05-06	24.6	78.3	1
00:14:13	2018-05-07	24.3	78.1	1
00:44:13	2018-05-07	25.3	70.3	1
01:14:13	2018-05-07	25.1	70	1
01:44:13	2018-05-07	25.2	69.6	1
02:14:13	2018-05-07	25.1	69.3	1
02:44:13	2018-05-07	25.1	69.1	1
03:14:13	2018-05-07	25.1	69	1
03:44:13	2018-05-07	25.1	69	1
04:14:13	2018-05-07	25.1	68.9	1
04:44:13	2018-05-07	25.1	68.9	1
05:14:13	2018-05-07	25	68.8	1
05:44:13	2018-05-07	25	68.8	1
06:14:13	2018-05-07	25	68.8	1
06:44:13	2018-05-07	24.9	70.7	1
07:14:13	2018-05-07	24.9	70.4	1
07:44:13	2018-05-07	24.9	71	1
08:14:13	2018-05-07	24.8	70.6	1
08:44:13	2018-05-07	25.1	72.8	1
23:14:13	2018-05-07	26	74.1	1
23:44:13	2018-05-07	26.1	72.2	1
00:14:13	2018-05-08	26.1	73.2	1
00:44:13	2018-05-08	26.1	73.1	1
01:14:13	2018-05-08	26.1	73.1	1
01:44:13	2018-05-08	26.1	73.2	1
02:14:13	2018-05-08	26	73.2	1
02:44:13	2018-05-08	26	73.2	1
03:14:13	2018-05-08	26	73.3	1
03:44:13	2018-05-08	25.9	73.3	1
04:14:13	2018-05-08	25.9	73.3	1
04:44:13	2018-05-08	25.8	73.3	1
05:14:13	2018-05-08	25.8	73.3	1
05:44:13	2018-05-08	25.7	73.4	1
06:14:13	2018-05-08	25.6	73.4	1
06:44:13	2018-05-08	25.6	73.4	1
07:14:13	2018-05-08	25.5	73.4	1
07:44:13	2018-05-08	25.4	73.9	1
08:14:13	2018-05-08	25.3	73.2	1
08:44:13	2018-05-08	26.8	73.6	1
23:14:13	2018-05-08	25.9	79.6	1
23:44:13	2018-05-08	26.6	73.1	1
00:14:13	2018-05-09	26.4	64.6	1
00:44:13	2018-05-09	26.4	63.2	1
01:14:13	2018-05-09	26.5	62.4	1
01:44:13	2018-05-09	26.7	63.1	1
02:14:13	2018-05-09	26.6	63.2	1
02:44:13	2018-05-09	26.5	62.6	1
03:14:13	2018-05-09	26.1	62.8	1
03:44:13	2018-05-09	26.1	63	1
04:14:13	2018-05-09	25.6	62.5	1
04:44:13	2018-05-09	25.2	63.3	1
05:14:13	2018-05-09	25	62.9	1
05:44:13	2018-05-09	25.1	63	1
06:14:13	2018-05-09	25	63.1	1
06:44:13	2018-05-09	25.3	63.4	1
07:14:13	2018-05-09	25.5	63.4	1
07:44:13	2018-05-09	25.5	63.4	1
08:14:13	2018-05-09	24.9	67.3	1
08:44:13	2018-05-09	24.3	67.8	1
23:14:13	2018-05-09	25.4	65.7	1
23:44:13	2018-05-09	25.2	65.7	1
00:14:13	2018-05-10	25.2	65.7	1
00:44:13	2018-05-10	25.4	65.7	1
01:14:13	2018-05-10	25.5	65.8	1
01:44:13	2018-05-10	25.3	65.9	1
02:14:13	2018-05-10	25.1	65.9	1
02:44:13	2018-05-10	25	65.9	1
03:14:13	2018-05-10	25	66	1
03:44:13	2018-05-10	25	66	1
04:14:13	2018-05-10	25	66	1
04:44:13	2018-05-10	25	66	1
05:14:13	2018-05-10	24.8	66.1	1
05:44:13	2018-05-10	24.8	66.1	1
06:14:13	2018-05-10	24.9	66.1	1
06:44:13	2018-05-10	24.9	66.1	1
07:14:13	2018-05-10	25	66.1	1
07:44:13	2018-05-10	25.1	66.1	1
08:14:13	2018-05-10	25	66.4	1
08:44:13	2018-05-10	25.1	66.4	1
23:14:13	2018-05-10	26.5	67.2	1
23:44:13	2018-05-10	26.4	67.2	1
00:14:13	2018-05-11	26.3	67.3	1
00:44:13	2018-05-11	25.9	67.4	1
01:14:13	2018-05-11	25.9	67.3	1
01:44:13	2018-05-11	25.7	67.3	1
02:14:13	2018-05-11	25.6	67.3	1
02:44:13	2018-05-11	25.5	67.3	1
03:14:13	2018-05-11	25.4	67.3	1
03:44:13	2018-05-11	25.2	67.4	1
04:14:13	2018-05-11	25.1	67.4	1
04:44:13	2018-05-11	25	67.4	1
05:14:13	2018-05-11	25	67.4	1
05:44:13	2018-05-11	25	67.4	1
06:14:13	2018-05-11	24.9	67.4	1
06:44:13	2018-05-11	24.9	67.4	1
07:14:13	2018-05-11	24.8	67.4	1
07:44:13	2018-05-11	24.8	67.5	1
08:14:13	2018-05-11	24.9	67.4	1
08:44:13	2018-05-11	25.7	67.1	1

## Sheet: Fig. S2
Figure S2. Changes in the VTM associated to hydration level (left), start temperature (center) and heating rate (left) in Loxopholis ferreirai (upper row) and L. percarinatum (lower row) lizards. Each color represents a specimen.

## Sheet: Fig. S3
Fig. S3. Changes in weigth experienced by L. percarinatum (left) and L. ferreirai (right) during our dehydration and rehydration procedures.

## Sheet: Table S1
Table s1. Models compared to identify important factors driving the VTM of loxoholis lizards and full results of model fitting.
m0 <- lme(vtm ~ 1, random = ~1|id, method = "ML",vtm)
m1 <- lme(vtm ~ hl, random = ~1|id, method = "ML",vtm)
m2 <- lme(vtm ~ hl+turn, random = ~1|id, method = "ML",vtm)
m3 <- lme(vtm ~ hl+startt, random = ~1|id, method = "ML",vtm)
m4 <- lme(vtm ~ hl+hrate, random = ~1|id, method = "ML",vtm)
m5 <- lme(vtm ~ hl+weight, random = ~1|id, method = "ML",vtm)
> AIC(m0,m1,m2,m3,m4,m5)#
Full results' tables for Loxopholis ferreirai
A. results of model selection
df AIC
m1 4 127.3940
m2 5 128.1815
m3 5 113.7595
m4 5 118.4861
m5 5 128.4109
m6 3 135.6215
Only model 1,3, and 4 led to sucessive descreases in AIC, thus, turn and body size were not included in the final model
B. Model fit, when including all relevant factors
Linear mixed-effects model fit by maximum likelihood
Data: vtm
AIC BIC logLik
108.834 116.609 -48.41699
Random effects:
Formula: ~1 | id
(Intercept) Residual
StdDev: 0.0001390477 1.453949
Fixed effects: vtm ~ hl + hrate + startt
Value Std.Error DF t-value p-value
(Intercept) -2.6810576 5.939636 15 -0.451384 0.6582
hl 0.1214371 0.053401 15 2.274066 0.0381
hrate 2.3939034 0.923115 15 2.593290 0.0204
startt 0.7700422 0.186314 15 4.133032 0.0009
Correlation:
(Intr) hl hrate
hl -0.622
hrate 0.290 -0.289
startt -0.610 -0.225 -0.228
Standardized Within-Group Residuals:
Min Q1 Med Q3 Max
-1.5450487 -0.8453496 -0.2656679 0.6356816 2.7817020
C. Confidence intervals for predictive factors
Fixed effects:
lower est. upper
(Intercept) -14.36574099 -2.6810576 9.0036257
hl 0.01638485 0.1214371 0.2264893
hrate 0.57791664 2.3939034 4.2098901
startt 0.40351785 0.7700422 1.1365666
attr(,"label")
[1] "Fixed effects:"
Random Effects:
Level: id
lower est. upper
sd((Intercept)) 0 0.0001390477 Inf
Within-group standard error:
lower est. upper
1.113577 1.453949 1.898358
Full results' tables for Loxopholis percarinatum
D. model selection results
df AIC
m0 3 238.3916
m1 4 220.3826
m2 5 219.7962
m3 5 215.9453
m4 5 218.5113
m5 5 220.476
conclusions similar result to L. ferreirai
E. results of fit with all relevant factors
Random effects:
Formula: ~1 | id
(Intercept) Residual
StdDev: 0.912148 1.188403
Fixed effects: vtm ~ hl + hrate + startt
Value Std.Error DF t-value p-value
(Intercept) 7.129112 3.454025 35 2.064001 0.0465
hl 0.118566 0.032584 35 3.638842 0.0009
hrate 0.588050 0.259190 35 2.268798 0.0296
startt 0.412070 0.148469 35 2.775466 0.0088
Correlation:
(Intr) hl hrate
hl -0.354
hrate -0.096 -0.070
startt -0.625 -0.502 0.067
Standardized Within-Group Residuals:
Min Q1 Med Q3 Max
-1.6896918 -0.7049418 0.1303572 0.6005971 1.7169819
Number of Observations: 57
Number of Groups: 19
E. Confidence intervals for fixed and random effects
Approximate 95% confidence intervals
Fixed effects:
lower est. upper
(Intercept) 0.36757950 7.1291120 13.8906445
hl 0.05478144 0.1185663 0.1823512
hrate 0.08066453 0.5880497 1.0954348
startt 0.12143052 0.4120702 0.7027098
attr(,"label")
[1] "Fixed effects:"
Random Effects:
Level: id
lower est. upper
sd((Intercept)) 0.540985 0.912148 1.537961
Within-group standard error:
lower est. upper
0.9478844 1.1884030 1.4899515

## Sheet: Table S2
Tables s2. A-D. Hydration level and experimental factors affecting the voluntary thermal maximum of Loxopholis lizards.
Table2A. Loxopholis ferreirai
> m=lme(vtm ~ hl+hrate+startt, random = ~1|id, method = "ML",vtm)
> summary (m)
Linear mixed-effects model fit by maximum likelihood
Data: vtm
AIC BIC logLik
108.834 116.609 -48.41699
Random effects:
Formula: ~1 | id
(Intercept) Residual
StdDev: 0.0001390477 1.453949
Fixed effects: vtm ~ hl + hrate + startt
Value Std.Error DF t-value p-value
(Intercept) -2.6810576 5.939636 15 -0.451384 0.6582
hl 0.1214371 0.053401 15 2.274066 0.0381
hrate 2.3939034 0.923115 15 2.593290 0.0204
startt 0.7700422 0.186314 15 4.133032 0.0009
Correlation:
(Intr) hl hrate
hl -0.622
hrate 0.290 -0.289
startt -0.610 -0.225 -0.228
Table2B. Loxopholis percarinatum
> m=lme(vtm ~ hl+hrate+startt, random = ~1|id, method = "ML",vtm)
> print(summary(mr,ddf="Kenward-Roger"))
Linear mixed-effects model fit by maximum likelihood
Data: vtm
AIC BIC logLik
62.80474 70.57976 -25.40237
Random effects:
Formula: ~1 | id
(Intercept) Residual
StdDev: 0.0632385 0.6167537
Fixed effects: blom(vtm, method = "rankit") ~ hl + hrate + startt
Value Std.Error DF t-value p-value
(Intercept) -10.918870 2.5267011 15 -4.321394 0.0006
hl 0.034044 0.0227419 15 1.496977 0.1551
hrate 0.937693 0.3938857 15 2.380623 0.0310
startt 0.255340 0.0796239 15 3.206827 0.0059
Correlation:
(Intr) hl hrate
hl -0.619
hrate 0.293 -0.289
startt -0.610 -0.228 -0.231
Table2C. Models compared to identify important factors driving the VTM of loxoholis percarinatum lizards and full results of model fitting
> m0 <- lme(vtm ~ 1, random = ~1|id, method = "ML",vtm)
> m1 <- lme(vtm ~ hl, random = ~1|id, method = "ML",vtm)
> m2 <- lme(vtm ~ hl+turn, random = ~1|id, method = "ML",vtm)
> m3 <- lme(vtm ~ hl+startt, random = ~1|id, method = "ML",vtm)
> m4 <- lme(vtm ~ hl+hrate, random = ~1|id, method = "ML",vtm)
> m5 <- lme(vtm ~ hl+weight, random = ~1|id, method = "ML",vtm)
>
> AIC(m0,m1,m2,m3,m4,m5)#
df AIC
m0 3 135.6215
m1 4 127.3940
m2 5 128.1815
m3 5 113.7595
m4 5 118.4861
m5 5 128.4109
Table 2D. Output of the same model for L. percarinatum ater using rankit function to further normalize residuals
Linear mixed-effects model fit by maximum likelihood
Data: vtm
AIC BIC logLik
59.68673 68.75759 -22.84337
Random effects:
Formula: ~1 | id
(Intercept) Residual
StdDev: 0.2579432 0.5133105
Fixed effects: blom(vtm, method = "rankit") ~ hl + turn + startt + hrate
Value Std.Error DF t-value p-value
(Intercept) -12.424745 2.4325661 14 -5.107670 0.0002
hl 0.049986 0.0214648 14 2.328725 0.0354
turn 0.319316 0.1419023 14 2.250254 0.0410
startt 0.226791 0.0758919 14 2.988337 0.0098
hrate 1.059777 0.3658513 14 2.896743 0.0117
Correlation:
(Intr) hl turn startt
hl -0.619
turn -0.385 0.297
startt -0.580 -0.255 0.033
hrate 0.340 -0.285 -0.051 -0.286
Standardized Within-Group Residuals:
Min Q1 Med Q3 Max
-1.7789985 -0.6239532 -0.1051230 0.6884358 2.3564350
Number of Observations: 27
Number of Groups: 9

## Sheet: Table S3
Table S3. Effects of different NicheMapR parameters on the predicted extent of sites where body temperatures may tresspass the voluntary thermal maximum of Loxopholis lizards, across the Amazon's basin.
Generalized least squares fit by REML
Model: extent ~ amass + VTMAX + moist_surface + maxdepth + rainmult + maxshad
Data: dt
AIC BIC logLik
686.306 702.6504 -335.153
Coefficients:
Value Std.Error t-value p-value
(Intercept) 9141.554 233.42611 39.16252 0.0000
amass -20.024 155.91626 -0.12843 0.8983
VTMAX -217.109 6.69141 -32.44600 0.0000
moist_surface -0.014 0.16059 -0.08951 0.9290
maxdepth -0.167 5.35312 -0.03113 0.9753
rainmult -171.375 32.11875 -5.33567 0.0000
maxshad -9.169 0.80297 -11.41856 0.0000
Correlation:
(Intr) amass VTMAX mst_sr mxdpth ranmlt
amass -0.385
VTMAX -0.860 0.000
moist_surface -0.034 0.000 0.000
maxdepth -0.057 0.000 0.000 0.000
rainmult -0.103 0.000 0.000 0.000 0.000
maxshad -0.310 0.000 0.000 0.000 0.000 0.000
Standardized residuals:
Min Q1 Med Q3 Max
-1.6112085 -0.4244503 0.2033470 0.6555264 1.2288383
Residual standard error: 64.2375
Degrees of freedom: 64 total; 57 residual

## Sheet: Table S4
Table S4. Effects of different NicheMapR parameters on the predicted duration of body temperatures tresspassing the voluntary thermal maximum of Loxopholis lizards, across the Amazon's basin.
Generalized least squares fit by REML
Model: meanduration ~ amass + VTMAX + moist_surface + maxdepth + rainmult + maxshad
Data: dt
AIC BIC logLik
655.9641 672.3085 -319.9821
Coefficients:
Value Std.Error t-value p-value
(Intercept) 3946.847 178.87888 22.064357 0.0000
amass -2.794 119.48161 -0.023387 0.9814
VTMAX -110.571 5.12775 -21.563344 0.0000
moist_surface 0.005 0.12307 0.039810 0.9684
maxdepth -0.110 4.10220 -0.026712 0.9788
rainmult 35.400 24.61321 1.438244 0.1558
maxshad -4.637 0.61533 -7.535710 0.0000
Correlation:
(Intr) amass VTMAX mst_sr mxdpth ranmlt
amass -0.385
VTMAX -0.860 0.000
moist_surface -0.034 0.000 0.000
maxdepth -0.057 0.000 0.000 0.000
rainmult -0.103 0.000 0.000 0.000 0.000
maxshad -0.310 0.000 0.000 0.000 0.000 0.000
Standardized residuals:
Min Q1 Med Q3 Max
-1.4649646 -0.7387950 0.2058338 0.8311931 1.0546675
Residual standard error: 49.22642
Degrees of freedom: 64 total; 57 residual

## Sheet: Table S5
Table S5. Effects of different NicheMapR parameters on the predicted extent of body temperatures tresspassing the voluntary thermal maximum of Loxopholis lizards, across the Amazon's basin.
Generalized least squares fit by REML
Model: percpoints ~ amass + VTMAX + moist_surface + maxdepth + rainmult + maxshad
Data: dt
AIC BIC logLik
312.5864 328.9308 -148.2932
Coefficients:
Value Std.Error t-value p-value
(Intercept) -388.3554 8.798874 -44.13694 0.0000
amass -0.5309 5.877181 -0.09034 0.9283
VTMAX 13.1841 0.252229 52.27019 0.0000
moist_surface 0.0017 0.006053 0.27840 0.7817
maxdepth -0.0182 0.201783 -0.09034 0.9283
rainmult 11.7165 1.210699 9.67748 0.0000
maxshad 0.0585 0.030267 1.93402 0.0581
Correlation:
(Intr) amass VTMAX mst_sr mxdpth ranmlt
amass -0.385
VTMAX -0.860 0.000
moist_surface -0.034 0.000 0.000
maxdepth -0.057 0.000 0.000 0.000
rainmult -0.103 0.000 0.000 0.000 0.000
maxshad -0.310 0.000 0.000 0.000 0.000 0.000
Standardized residuals:
Min Q1 Med Q3 Max
-1.56551533 -0.91054778 -0.03479947 0.89833340 1.16267111
Residual standard error: 2.421399
Degrees of freedom: 64 total; 57 residual

[truncated: 6 more sheets: Table S6, Table S7, Table S8, Table S9, Table S10, Table S11]
